# Supplementary material
Source: Elsevier journal article supplement (https://www.sciencedirect.com/science/article/pii/S0213911116302588)
Supplement: mmc1 [file S0213911116302588:mmc1.docx]

**Apéndices**

**Apéndice A.** **Formulación analítica del análisis envolvente de datos**

La formulación analítica del análisis envolvente de datos (DEA, *Data Envelopment Analysis*) con rendimientos variables de escala y orientado a *input* en su versión envolvente es:


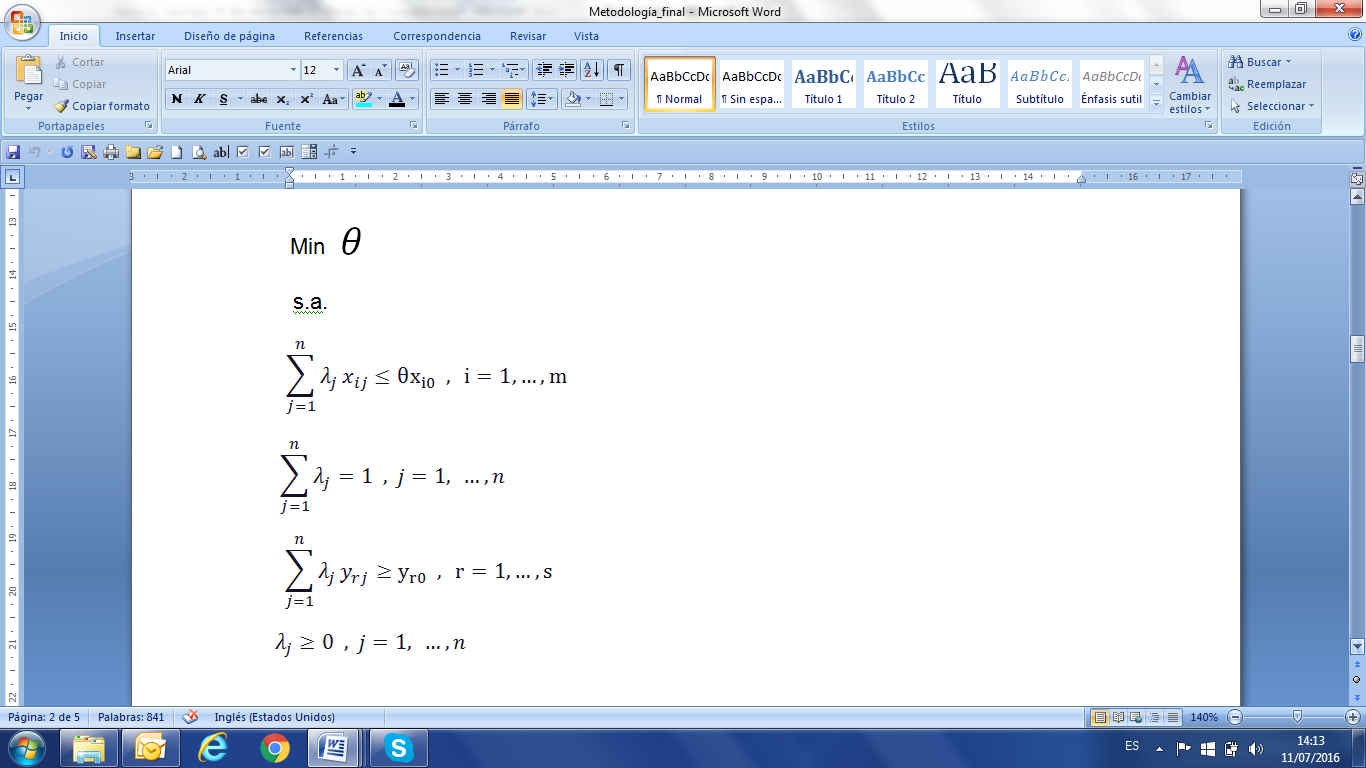


Este programa de optimización está formado por un vector de *n* hospitales constituido por *m* inputs y *r* outputs, de forma que:


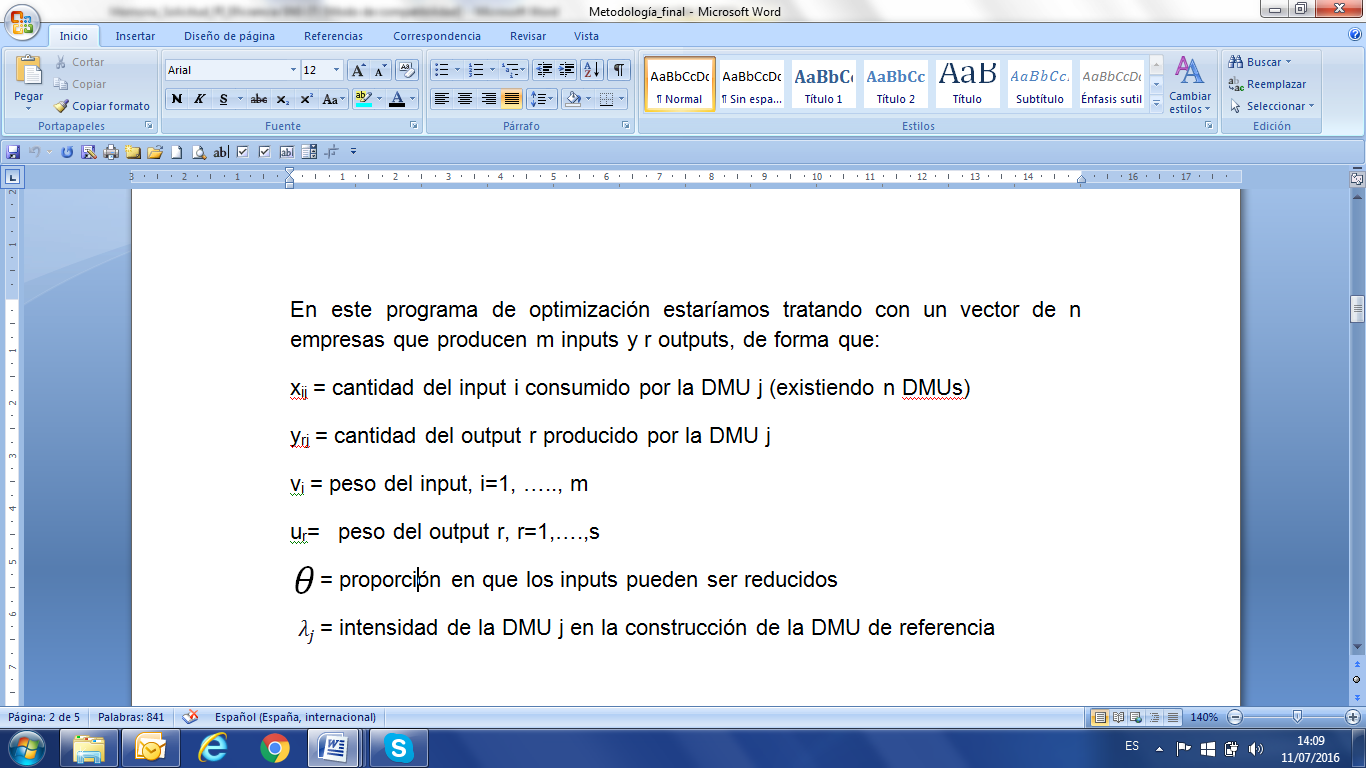


La formulación analítica del DEA con rendimientos constantes de escala se obtiene eliminando la restricción:


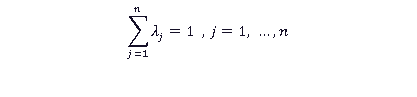


**Apéndice B. Formulación analítica del índice de Malmquist**

El índice de Malmquist permite medir la productividad, de forma que representaría la evolución de la eficiencia relativa de cada DMU a lo largo del tiempo. De este modo, cualquier IM entre el periodo t y t+1 viene definido por la expresión:

donde son vectores *inputs*-*output* de cada DMU analizada en el período *t* y es la eficiencia de la DMU *i* en el periodo *t*. De forma que el segundo miembro se divide en dos componentes: el cambio de la eficiencia técnica y el cambio tecnológico (o progreso de la tecnología). Cuando el enfoque se realiza con orientación al *input,* un resultado menor de 1 implicaría una mejora de la productividad en el tiempo, y un resultado igual a 1 indica que no ha habido empeoramiento ni mejora de la productividad.

**Apéndice C. Formulación analítica del modelo de regresión multinivel**

Para identificar los factores relacionados con la eficiencia técnica se formula una regresión lineal multinivel con efectos fijos, en la cual los hospitales (nivel 1) están agrupados en comunidades autónomas (nivel 2).

El modelo jerárquico de dos niveles establece la relación:

donde *Yij* es el valor de la variable respuesta para el hospital *i,* perteneciente a la comunidad autónoma *j*. Esta variable es modelada como función lineal de las características del hospital de la comunidad autónoma, representadas por *X1,...,Xp*, y dos efectos aleatorios, uno correspondiente al segundo nivel *(uj)* y otro al residual del primer nivel *(eij).* Ambos componentes aleatorios se distribuyen según una normal de media cero y varianza σu2 y σe2, respectivamente.
